# Supplementary material for: Selective fluorescence functionalization of dye-doped polymerized structures fabricated by direct laser writing (DLW) lithography
Source: Royal Society of Chemistry journal article supplement (doi:10.1039/c5nr06071k), 2015-01-01
Supplement: c5nr06071k1.pdf [file c5nr06071k1.pdf]

## Supporting Information to

# Selective fluorescence functionalization of dye-doped polymerized structures fabricated by Direct Laser Writing (DLW) Lithography

Gustavo de Miguel,<sup>\*,†,#</sup> Giuseppe Vicidomini,<sup>†</sup> Martí Duocastella,<sup>†</sup> Alberto Diaspro<sup>†,‡</sup>

<sup>†</sup> Nanoscopy, Department of Nanophysics, Istituto Italiano di Tecnologia, Genoa, Via Morego 30, 16163, Italy

<sup>‡</sup> NIC@IIT, Istituto Italiano di Tecnologia, Genoa, Via Morego 30, 16163, Italy

<sup>#</sup> Institute of Fine Chemistry and Nanochemistry, Department of Physical Chemistry and Applied Thermodynamics, University of Cordoba, Campus Universitario de Rabanales, Edificio Marie Curie, Cordoba, Spain E-14014.

e-mail: [gustavo.demiguel@iit.it](mailto:gustavo.demiguel@iit.it) and [gmiguel@uco.es](mailto:gmiguel@uco.es)

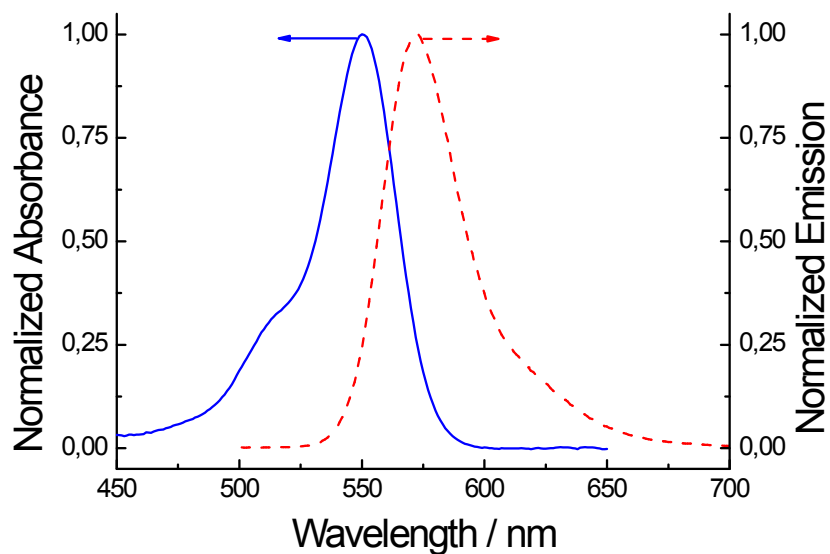

**Figure S1.** Normalized absorption (solid line) and emission spectra (dashed line) of ATTO 565 dissolved in PETA.  $\lambda_{\text{exc}} = 488 \text{ nm}$ .

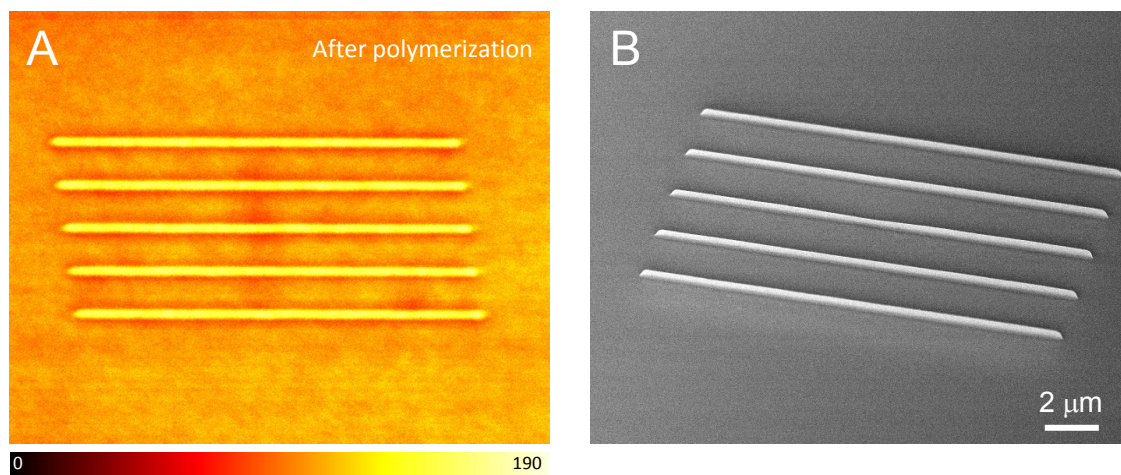

**Figure S2.** A) Confocal fluorescence image of five photopolymerized lines fabricated with regular DLW lithography with an ATTO 565 doped resin. B) Scanning Electron Microscopy (SEM) image of the same photopolymerized lines as in A).  $\lambda_{\text{exc}} = 532 \text{ nm}$

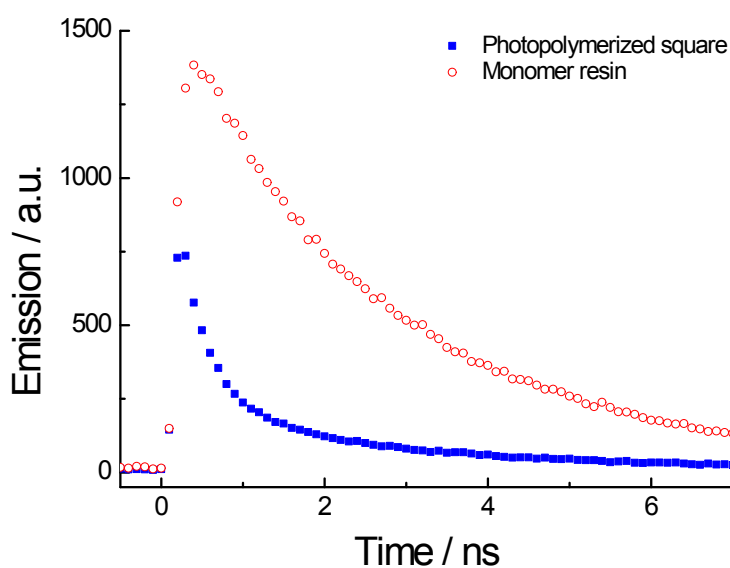

**Figure S3.** Nanosecond fluorescence decays (540-640 nm) measured at the monomer resin (red empty circles) or the photopolymerized square (blue filled squares) from Figure 1A.  $\lambda_{\text{exc}} = 488$  nm.

The fluorescence quantum yield ( $\Phi_{fl}$ ) is related to the rate constants of the radiative ( $k_{fl}$ ) and non-radiative ( $k_{nr}$ ) deactivation pathways of the emissive state through equation (1).

$$\Phi_{fl} = \frac{k_{fl}}{k_{fl} + k_{nr}} \quad \text{equation 1}$$

The lifetime calculated with the decay of the fluorescence signal can be expressed as a function of the radiative ( $k_{fl}$ ) and non-radiative ( $k_{nr}$ ) rate constants with the equation (2).

$$\tau_{S1} = \frac{1}{k_{fl} + k_{nr}} \quad \text{equation 2}$$

Substituting equation (2) in (1) gives  $\Phi_{fl} = \tau_{S1}k_{fl}$ .

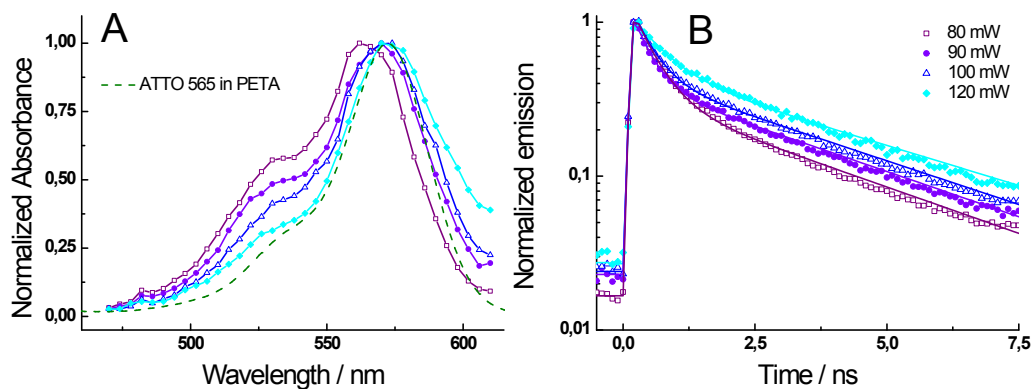

**Figure S4.** Normalized excitation spectra (A) and time profiles of the fluorescence signal (B) of ATTO 565 embedded in polymerized squares with different relative ratio of H-aggregate/monomer. An increasing power of the fabricating beam was used: 80 (empty squares), 90 (filled circles), 100 (empty triangles) and 120 (filled diamond) mW. The steady-state absorption spectrum of ATTO 565 dissolved in PETA is shown in (A) for comparison (green dashed line). The solid lines in (B) correspond to the best bi-exponential fits of the experimental data.  $\lambda_{\text{exc}} = 488 \text{ nm}$ .
